# Supplementary material for: Synergistic Effects of Weighted Genetic Risk Scores and Resistin and sST2 Levels on the Prognostication of Long-Term Outcomes in Patients with Coronary Artery Disease
Source: MDPI journal article supplement (doi:10.3390/ijms23084292), 2022-04-13
Supplement: s1 [file s1]

## Supplementary Materials

### Synergistic effects of weighted genetic risk scores and resistin and sST2 levels on the prognostication of long-term outcomes in patients with coronary artery disease

Supplementary Figure S1. Regional association plots for resistin levels from the whole genome sequence study of 880 Taiwan Biobank participants with 509 SNPs at positions between 7.715 and 7.755 Mb on chromosome 19p13.2 around the *RETN* gene region.

(A) Before conditional analysis

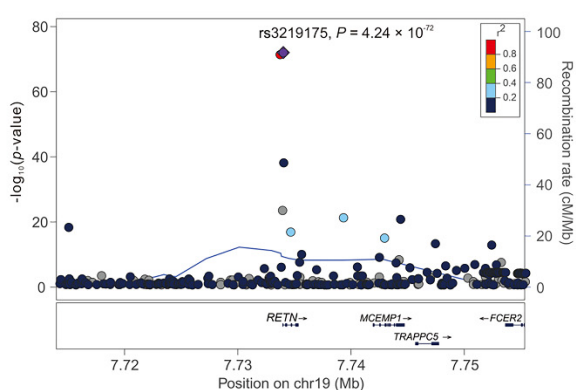

(B) First conditional analysis

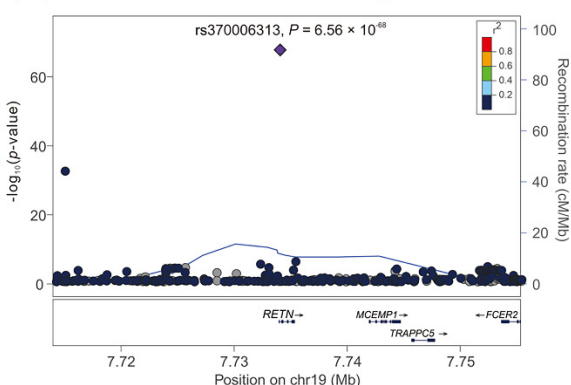

(C) Second conditional analysis

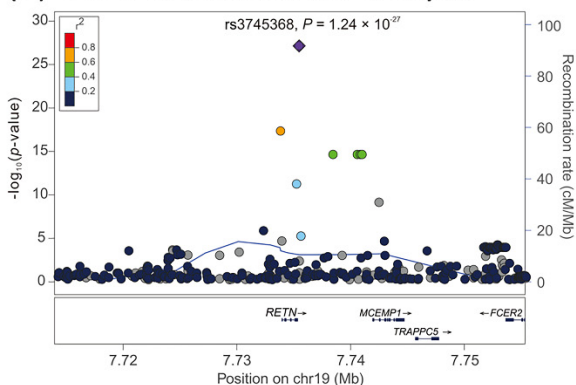

(D) Third conditional analysis

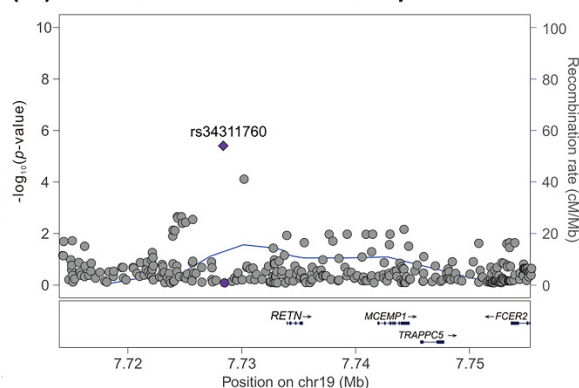

(A) Before conditional analysis, regional association plots show rs3219175 as the lead SNP that is strongly associated with resistin levels. (B) After first conditional analysis adjusting for rs3219175 genotype, rs370006313 in the regional plot of *RETN* locus becomes significant association with resistin levels (C) After second conditional analysis adjusting for both rs3219175 and rs370006313 genotypes, rs3745368 is significantly associated with resistin levels. (D) After third conditional analysis adjusting for the aforementioned SNPs, no more single SNP is found to be genome-wide significantly associated with resistin levels.

Supplementary Figure S2. Regional association plots for sST2 levels from the whole genome sequence study of 859 Taiwan Biobank participants with 307 SNPs at positions between 102.915 and 102.985 Mb on chromosome 2q12.1 around the *IL1RL1* gene region.

(A) Before conditional analysis

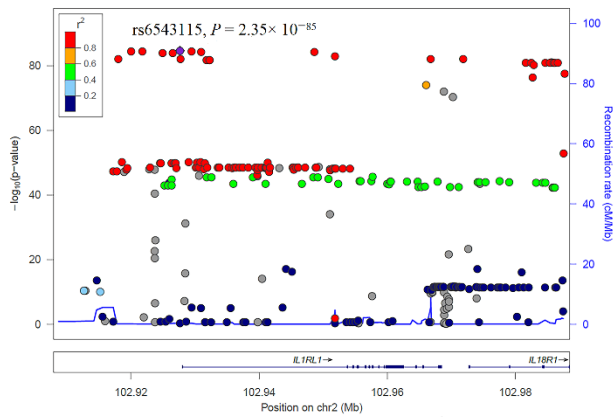

(B) First conditional analysis

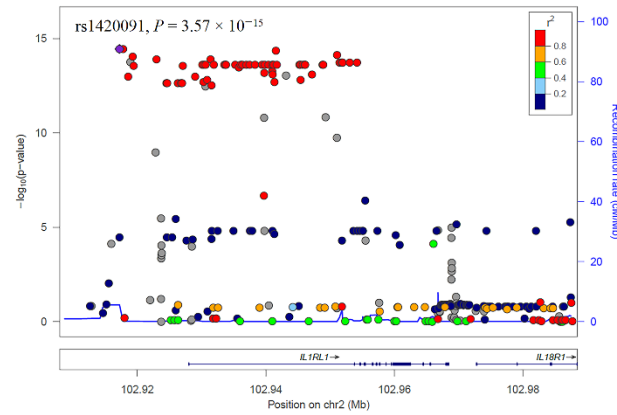

(C) Second conditional analysis

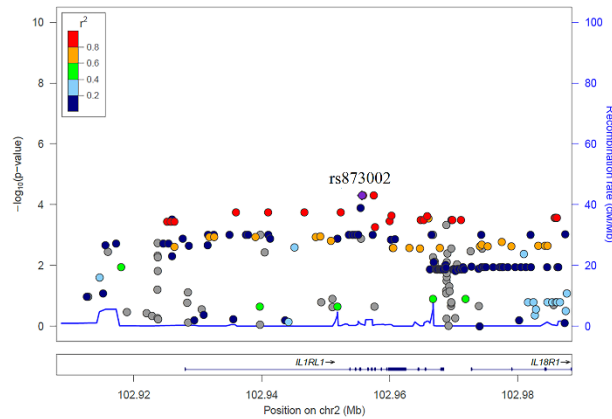

(A) Before conditional analysis, regional association plots show rs6543115 as the lead SNP that is strongly associated with sST2 levels. (B) After first conditional analysis adjusting for rs6543115 genotype, rs1420091 in the regional plot at the *IL1RL1* locus became more significant association with sST2 levels. (C) After second conditional analysis adjusting for the two aforementioned SNPs, none of the SNP is found to be genome-wide significantly associated with sST2 levels.

Supplementary Figure S3. Linkage disequilibrium of *ILIRLI* lead SNPs.

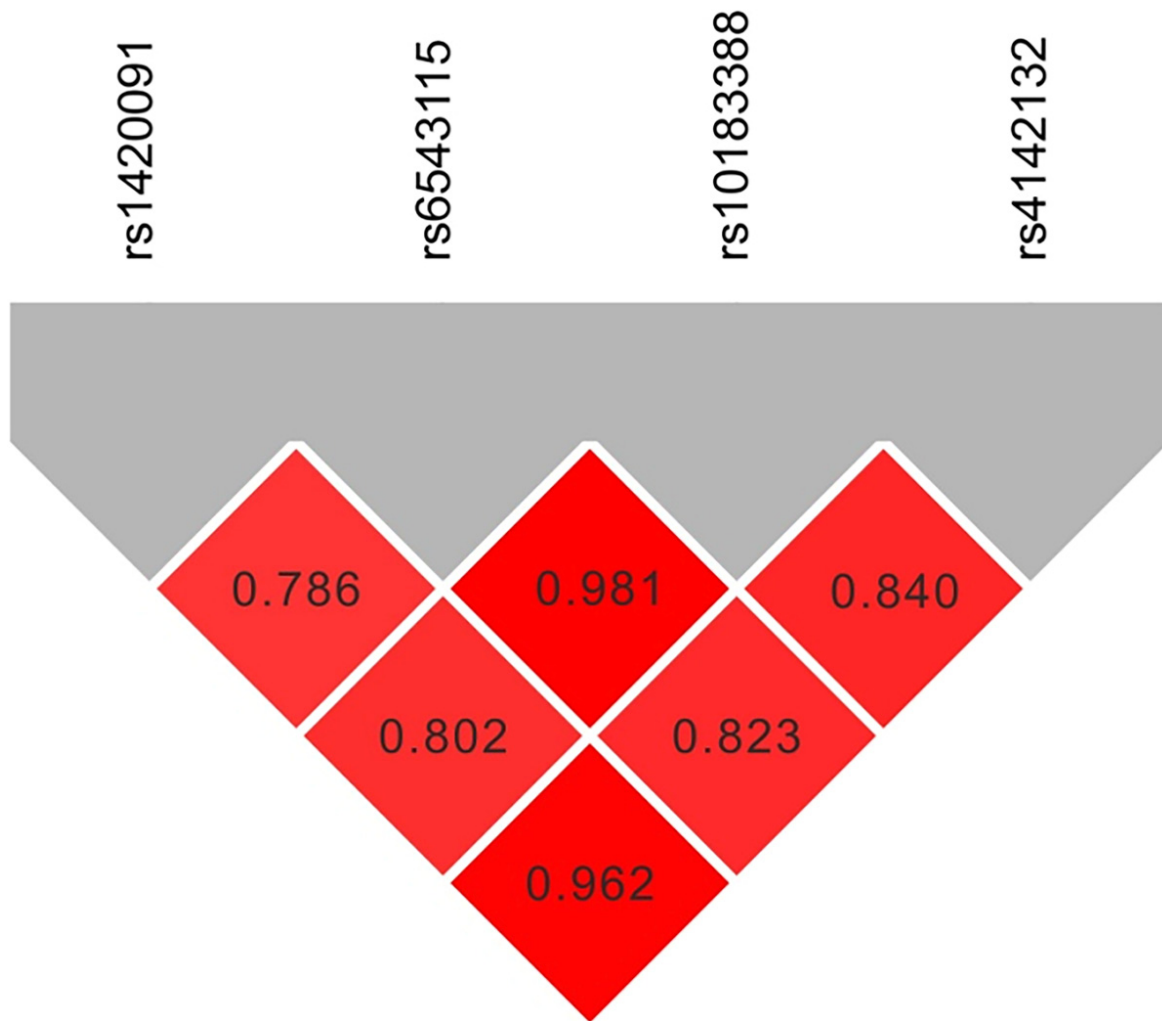

The *ILIRLI* lead SNPs rs10183388 and rs4142132 from the GWAS study of Taiwan Biobank participants are in nearly complete linkage disequilibrium with the *ILIRLI* lead SNPs rs6543115 and rs1420091 respectively in the WGS study ( $r^2 = 0.98$  and  $0.96$ , respectively).

Supplementary Figure S4. The flowchart of participants enrolled in the (A) Taiwan Biobank cohort (B) Cardiovascular healthy examination cohort and (C) coronary artery disease cohort.

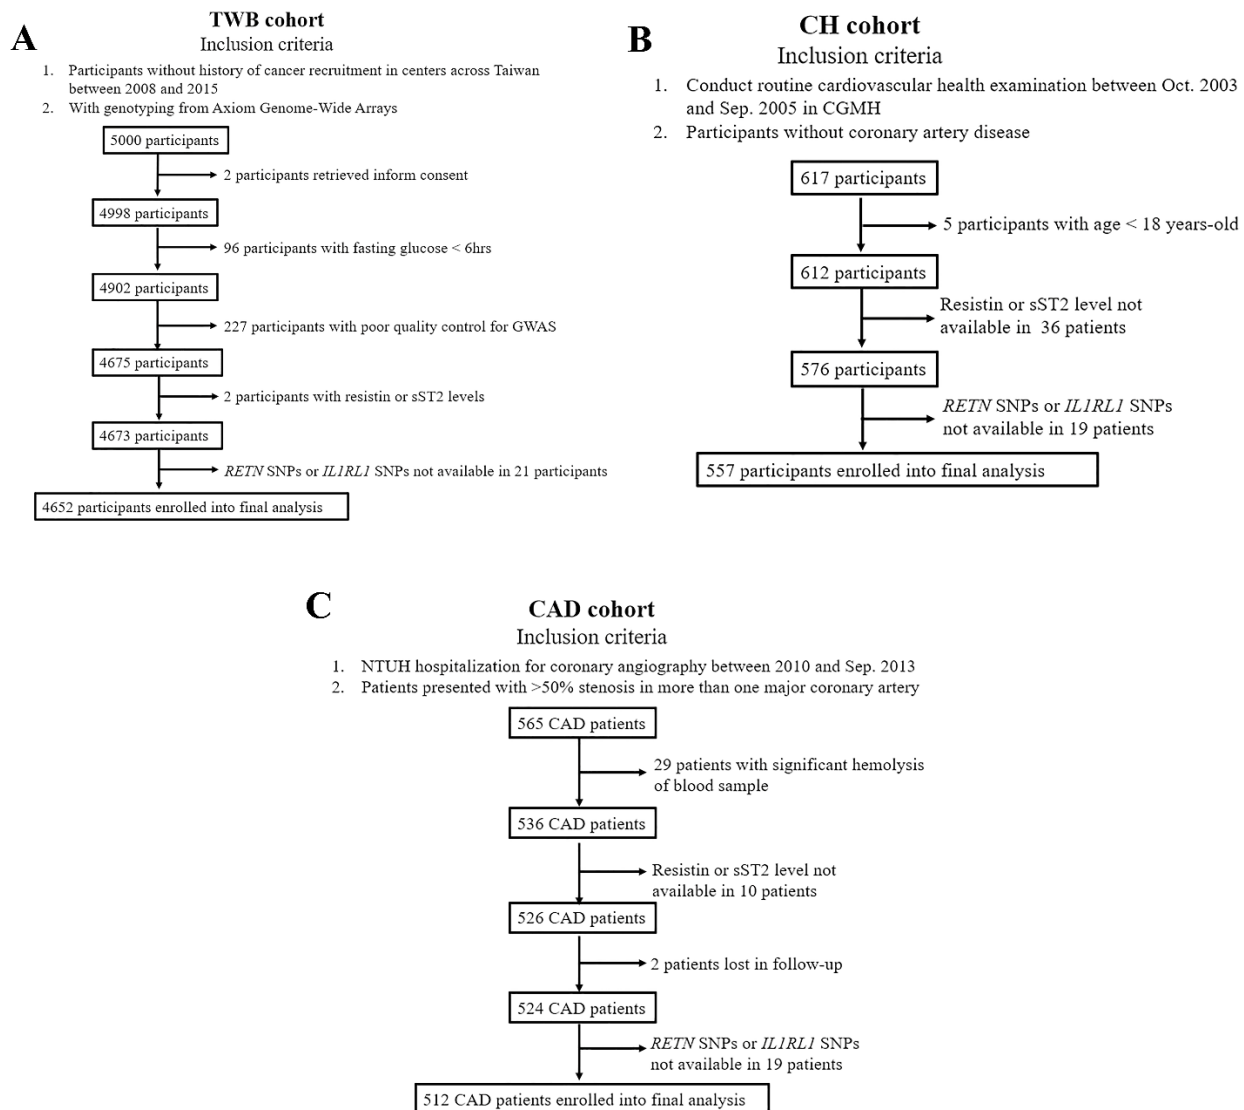

Supplementary Table S1. Stepwise linear regression for the resistin and sST2 levels in Taiwan Biobank cohort

|                          | Resistin level |       |                |                          | sST2 levels |        |                |                         |
|--------------------------|----------------|-------|----------------|--------------------------|-------------|--------|----------------|-------------------------|
|                          | Beta           | se    | r <sup>2</sup> | P                        | Beta        | se     | r <sup>2</sup> | P                       |
| Sex                      | -0.034         | 0.005 | 0.006          | 2.21×10 <sup>-10</sup>   | -0.1626     | 0.005  | 0.136          | 3.90×10 <sup>-212</sup> |
| Age                      | --             | --    | --             | --                       | 0.001       | <0.001 | 0.001          | 0.002                   |
| Body mass index          | 0.003          | 0.001 | 0.001          | 4.83×10 <sup>-4</sup>    | --          | --     | --             | --                      |
| Smoking                  | --             | --    | --             | --                       | --          | --     | --             | --                      |
| <i>RETN</i> rs3219175    | 0.272          | 0.005 | 0.339          | <1.00×10 <sup>-307</sup> |             |        |                |                         |
| <i>RETN</i> rs370006313  | 0.828          | 0.020 | 0.138          | <1.00×10 <sup>-307</sup> |             |        |                |                         |
| <i>RETN</i> rs3745368    | -0.126         | 0.005 | 0.060          | 6.01×10 <sup>-126</sup>  |             |        |                |                         |
| <i>IL1RL1</i> rs10183388 |                |       |                |                          | 0.290       | 0.009  | 0.251          | 4.36×10 <sup>-191</sup> |
| <i>IL1RL1</i> rs4142132  |                |       |                |                          | -0.143      | 0.009  | 0.029          | 7.93×10 <sup>-51</sup>  |

sST2, soluble suppression of tumorigenicity 2.

Supplementary Table S2. SNPs table of *RETN* and *ILIRLI*

| Chr | rs number   | Position   | Gene locus    | Location related to TIS | Function                     | Genotype | MAF    |
|-----|-------------|------------|---------------|-------------------------|------------------------------|----------|--------|
| 19  | rs3219175   | 19:7733855 | <i>RETN</i>   | -358                    | TFBS                         | G/A      | 0.188  |
| 19  | rs370006313 | 19:7733894 | <i>RETN</i>   | -319                    | --                           | G/A      | 0.009  |
| 19  | rs3745368   | 19:7735297 | <i>RETN</i>   | 1084                    | Splicing(ESE or ESS) 、 miRNA | G/A      | 0.150  |
| 2   | rs10183388  | 102932247  | <i>ILIRLI</i> | 4285                    | Intron Variant               | T/C      | 0.456  |
| 2   | rs4142132   | 102937482  | <i>ILIRLI</i> | 9520                    | Intron Variant               | G/A      | 0.4891 |

SNP, single nucleotide polymorphism; MAF, minor allele frequency; TFBS, transcription factor binding site; TIS, transcription initiation site.

Supplementary Table S3. Correlation of resistin and sST2 levels with clinical, metabolic, biochemical and hematological parameters in Taiwan Biobank participants (N=4652)

|                  | Resistin levels*    |                        |                     |                        | sST2 levels*     |                         |         |                         |
|------------------|---------------------|------------------------|---------------------|------------------------|------------------|-------------------------|---------|-------------------------|
|                  | Model 1             |                        | Model 2             |                        | Model 1          |                         | Model 2 |                         |
|                  | Standard<br>$\beta$ | P value                | Standard<br>$\beta$ | P value                | Standard $\beta$ | P value                 | P value | P value                 |
| Age              | -0.031              | 0.032                  | -                   | -                      | 0.024            | 0.108                   | -       | -                       |
| Female           | -0.078              | $1.09 \times 10^{-7}$  | -                   | -                      | -0.366           | $1.31 \times 10^{-147}$ | -       | -                       |
| BMI              | 0.053               | $3.03 \times 10^{-4}$  | -                   | -                      | 0.084            | $9.33 \times 10^{-9}$   | -       | -                       |
| Smoking          | 0.056               | $1.19 \times 10^{-4}$  | -                   | -                      | 0.106            | $3.49 \times 10^{-13}$  | -       | -                       |
| Hypertension     | 0.029               | 0.048                  | 0.025               | 0.107                  | 0.062            | $2.50 \times 10^{-5}$   | 0.013   | 0.376                   |
| Diabetes         | 0.035               | 0.017                  | 0.033               | 0.027                  | 0.060            | $7.00 \times 10^{-6}$   | 0.048   | 0.001                   |
| Cholesterol      | -0.063              | $1.8 \times 10^{-5}$   | -0.061              | $3.9 \times 10^{-5}$   | 0.027            | 0.069                   | 0.038   | 0.006                   |
| Triglyceride*    | 0.037               | 0.011                  | 0.012               | 0.462                  | 0.100            | $7.14 \times 10^{-12}$  | 0.016   | 0.283                   |
| HDL-C            | -0.089              | $1.46 \times 10^{-9}$  | -0.063              | $1.24 \times 10^{-4}$  | -0.096           | $5.66 \times 10^{-11}$  | 0.044   | 0.005                   |
| LDL-C            | -0.039              | 0.007                  | -0.047              | 0.002                  | 0.039            | 0.007                   | 0.019   | 0.168                   |
| AST              | 0.025               | 0.085                  | 0.033               | 0.332                  | 0.156            | $1.67 \times 10^{-26}$  | 0.116   | $7.12 \times 10^{-17}$  |
| Uric acid        | 0.055               | $1.78 \times 10^{-4}$  | 0.006               | 0.761                  | 0.218            | $3.21 \times 10^{-51}$  | 0.038   | 0.028                   |
| eGFR             | -0.087              | $2.35 \times 10^{-9}$  | -0.090              | $1.50 \times 10^{-8}$  | -0.133           | $6.49 \times 10^{-20}$  | -0.037  | 0.014                   |
| Leukocyte counts | 0.133               | $9.00 \times 10^{-20}$ | 0.121               | $1.81 \times 10^{-15}$ | 0.107            | $2.19 \times 10^{-13}$  | 0.083   | $5.46 \times 10^{-9}$   |
| Hematocrit       | 0.057               | $1.10 \times 10^{-4}$  | 0.009               | 0.608                  | 0.223            | $1.30 \times 10^{-53}$  | 0.005   | 0.780                   |
| Platelet counts  | 0.023               | 0.111                  | 0.033               | 0.034                  | -0.079           | $8.15 \times 10^{-8}$   | 0.011   | 0.451                   |
| RETN WGRS        | 0.729               | 0.00E0                 | 0.782               | 0.00E0                 |                  |                         |         |                         |
| IL1RL1 WGRS      |                     |                        |                     |                        | 0.464            | $1.15 \times 10^{-246}$ | 0.524   | $3.71 \times 10^{-296}$ |

sST2, soluble suppression of tumorigenicity 2; BMI, body mass index; HDL-C, high-density lipoprotein cholesterol; LDL-C, low-density lipoprotein cholesterol; AST, aspartate aminotransferase; eGFR, estimated glomerular filtration rate; WGRS, weighted genetic risk score

\*Data with skew distribution are logarithmically transformed before statistical testing to meet the assumption of normal distribution.

Model 1: Unadjusted correlations between resistin and sST2 levels with variables of interest.

Model 2: Adjusted for age, sex, BMI and smoking.

Supplementary Table S4. Correlation of resistin and sST2 levels with clinical, metabolic, biochemical and hematological parameters in CH participants (N=557)

|                    | Resistin levels* |                        |                  |                        | sST2 levels*     |                        |                  |                        |
|--------------------|------------------|------------------------|------------------|------------------------|------------------|------------------------|------------------|------------------------|
|                    | Model 1          |                        | Model 2          |                        | Model 1          |                        | Model 2          |                        |
|                    | Standard $\beta$ | P value                |
| Age                | 0.023            | 0.581                  | -                | -                      | -0.028           | 0.530                  | -                | -                      |
| Female             | 0.054            | 0.207                  | -                | -                      | -0.258           | $6.59 \times 10^{-10}$ | -                | -                      |
| -0.003             | 0.003            | 0.946                  | -                | -                      | 0.006            | 0.889                  | -                | -                      |
| Smoking            | 0.018            | 0.680                  | -                | -                      | 0.082            | 0.052                  | -                | -                      |
| Hypertension       | -0.004           | 0.927                  | -0.013           | 0.783                  | 0.005            | 0.914                  | 0.009            | 0.840                  |
| Diabetes           | 0.036            | 0.402                  | 0.035            | 0.409                  | 0.014            | 0.733                  | 0.012            | 0.765                  |
| Fasting glucose    | 0.013            | 0.767                  | 0.016            | 0.378                  | 0.033            | 0.434                  | 0.012            | 0.768                  |
| Cholesterol        | -0.103           | 0.015                  | -0.110           | 0.011                  | 0.041            | 0.336                  | 0.036            | 0.394                  |
| Triglyceride*      | 0.003            | 0.936                  | 0.007            | 0.877                  | 0.046            | 0.276                  | -0.022           | 0.637                  |
| HDL-C              | -0.023           | 0.073                  | -0.053           | 0.275                  | -0.096           | 0.023                  | -0.005           | 0.919                  |
| LDL-C              | -0.095           | 0.025                  | -0.096           | 0.025                  | 0.071            | 0.095                  | 0.060            | 0.149                  |
| Uric acid          | -0.056           | 0.230                  | -0.031           | 0.580                  | 0.093            | 0.044                  | -0.023           | 0.668                  |
| eGFR               | -0.066           | 0.157                  | -0.015           | 0.149                  | 0.030            | 0.516                  | 0.017            | 0.808                  |
| <i>RETN</i> WGRS   | 0.639            | $2.61 \times 10^{-65}$ | 0.641            | $1.98 \times 10^{-65}$ |                  |                        |                  |                        |
| <i>IL1RL1</i> WGRS |                  |                        |                  |                        | 0.261            | $3.72 \times 10^{-10}$ | 0.266            | $5.25 \times 10^{-11}$ |

CH, Cardiovascular Health examination; BMI, body mass index; HDL-C, high-density lipoprotein cholesterol; LDL-C, low-density lipoprotein cholesterol; eGFR, estimated glomerular filtration rate; WGRS, weighted genetic risk score

\*Data with skew distribution are logarithmically transformed before statistical testing to meet the assumption of normal distribution.

Model 1: Unadjusted correlations between resistin and sST2 levels with variables of interest.

Model 2: Adjusted for age, sex, BMI and smoking.



Supplementary Table S5. Correlation of resistin and sST2 levels with clinical, metabolic, biochemical and hematological parameters in CAD participants (N=512)

|                  | Resistin levels* |                        |                  |                        | sST2 levels*     |                       |                  |                       |
|------------------|------------------|------------------------|------------------|------------------------|------------------|-----------------------|------------------|-----------------------|
|                  | Model 1          |                        | Model 2          |                        | Model 1          |                       | Model 2          |                       |
|                  | Standard $\beta$ | P value                | Standard $\beta$ | P value                | Standard $\beta$ | P value               | Standard $\beta$ | P value               |
| Age              | 0.004            | 0.932                  | -                | -                      | 0.053            | 0.229                 | -                | -                     |
| Female           | 0.096            | 0.030                  |                  |                        | -0.001           | 0.978                 | -                | -                     |
| BMI              | 0.013            | 0.775                  |                  |                        | -0.035           | 0.428                 | -                | -                     |
| Smoking          | 0.011            | 0.801                  |                  |                        | 0.050            | 0.259                 | -                | -                     |
| Hypertension     | 0.004            | 0.926                  |                  |                        | -0.003           | 0.946                 | 0.004            | 0.936                 |
| Diabetes         | 0.095            | 0.031                  | 0.080            | 0.076                  | 0.082            | 0.065                 | 0.085            | 0.061                 |
| Fasting glucose  | -0.045           | 0.358                  | -0.058           | 0.245                  | 0.020            | 0.684                 | 0.027            | 0.583                 |
| Cholesterol      | 0.071            | 0.110                  | 0.060            | 0.184                  | 0.025            | 0.573                 | 0.021            | 0.645                 |
| Triglyceride*    | 0.058            | 0.191                  | 0.044            | 0.350                  | -0.026           | 0.564                 | -0.014           | 0.773                 |
| HDL-C            | 0.024            | 0.780                  | 0.002            | 0.980                  | 0.009            | 0.919                 | -0.039           | 0.675                 |
| LDL-C            | 0.084            | 0.337                  | 0.118            | 0.185                  | 0.123            | 0.155                 | 0.105            | 0.239                 |
| AST              | 0.007            | 0.874                  | 0.003            | 0.955                  | 0.092            | 0.047                 | 0.091            | 0.050                 |
| Uric acid        | -0.040           | 0.391                  | -0.039           | 0.405                  | -0.007           | 0.887                 | -0.014           | 0.774                 |
| eGFR             | -0.170           | $1.35 \times 10^{-4}$  | -0.174           | $1.76 \times 10^{-4}$  | -0.194           | $1.30 \times 10^{-5}$ | -0.194           | $2.80 \times 10^{-5}$ |
| Leukocyte counts | 0.183            | $3.40 \times 10^{-5}$  | 0.182            | $7.20 \times 10^{-5}$  | 0.135            | 0.002                 | 0.144            | 0.002                 |
| Hematocrit       | -0.132           | 0.003                  | -0.137           | 0.006                  | -0.166           | $1.71 \times 10^{-4}$ | -0.193           | $1.19 \times 10^{-4}$ |
| Platelet counts  | 0.072            | 0.104                  | 0.062            | 0.189                  | -0.045           | 0.312                 | -0.036           | 0.447                 |
| RETN WGRS        | 0.385            | $1.09 \times 10^{-19}$ | 0.385            | $1.84 \times 10^{-19}$ |                  |                       |                  |                       |
| IL1RL1 WGRS      |                  |                        |                  |                        | 0.228            | $1.83 \times 10^{-7}$ | 0.226            | $3.01 \times 10^{-7}$ |

CAD, coronary artery disease; BMI, body mass index; HDL-C, high-density lipoprotein cholesterol; LDL-C, low-density lipoprotein cholesterol; AST, aspartate aminotransferase; eGFR, estimated glomerular filtration rate; WGRS, weighted genetic risk score

\*Data with skew distribution are logarithmically transformed before statistical testing to meet the assumption of normal distribution.

Model 1: Unadjusted correlations between resistin and sST2 levels with variables of interest.

Model 2: Adjusted for age, sex, BMI and smoking.

Supplementary Table S6. Cox regression analysis of all-cause mortality and MACEs rate between the groups stratified by the resistin levels and *RETN* WGRS

| Group 1*            |           | Group 2*         |         | Group 3*         |         | Group 4*          |                       |
|---------------------|-----------|------------------|---------|------------------|---------|-------------------|-----------------------|
| All-cause mortality |           |                  |         |                  |         |                   |                       |
| Patient numbers     | 201       | 55               |         | 132              |         | 124               |                       |
| Number of events    | 5         | 0                |         | 6                |         | 20                |                       |
|                     |           | HR (95% CI)      | P value | HR (95% CI)      | P value | HR (95% CI)       | P value               |
| Model 1             | Reference | 0 (0)            | 0.980   | 1.72 (0.53-5.64) | 0.371   | 6.24 (2.34-16.65) | 2.55×10 <sup>-4</sup> |
| Model 2             | Reference | 0 (0)            | 0.973   | 1.41 (0.43-4.66) | 0.573   | 5.83 (2.19-15.62) | 4.34×10 <sup>-4</sup> |
| Model 3             | Reference | 0 (0)            | 0.980   | 1.42 (0.43-4.70) | 0.565   | 5.53 (2.07-14.78) | 6.52×10 <sup>-4</sup> |
| Model 4             | Reference | 0 (0)            | 0.979   | 1.65 (0.29-9.58) | 0.574   | 7.44 (1.52-36.44) | 0.013                 |
| MACEs               |           |                  |         |                  |         |                   |                       |
| Patient numbers     | 201       | 55               |         | 132              |         | 124               |                       |
| Number of events    | 14        | 4                |         | 6                |         | 20                |                       |
|                     |           | HR (95% CI)      | P value | HR (95% CI)      | P value | HR (95% CI)       | P value               |
| Model 1             | Reference | 1.11 (0.37-3.38) | 0.835   | 1.34 (0.63-2.85) | 0.453   | 3.08 (1.61-5.88)  | 6.47×10 <sup>-4</sup> |
| Model 2             | Reference | 1.14 (0.37-3.46) | 0.823   | 1.19 (0.56-2.54) | 0.656   | 3.05 (1.60-5.84)  | 7.35×10 <sup>-4</sup> |
| Model 3             | Reference | 0.99 (0.32-3.04) | 0.984   | 1.17 (0.42-1.99) | 0.686   | 2.97 (1.55-5.68)  | 9.87×10 <sup>-4</sup> |
| Model 4             | Reference | 1.07 (0.35-3.28) | 0.912   | 0.91 (0.42-1.99) | 0.820   | 1.62 (0.78-3.35)  | 0.197                 |

\*Group 1, low resistin levels/low *RETN* WGRS; Group 2, low resistin levels/high *RETN* WGRS; Group 3, high resistin levels/high *RETN* WGRS; Group 4, high resistin levels/low *RETN* WGRS.

Abbreviations: HR, hazard ration; CI, confidence interval

Model 1, Unadjusted

Model 2, Adjusted for age, sex, BMI and smoking status

Model 3: Adjusted for age, sex, BMI, smoking status, diabetes mellitus, hypertension, and dyslipidemia.

Model 4: Adjusted for age, sex, BMI, smoking status, diabetes mellitus, hypertension, dyslipidemia, uric acid level, estimated glomerular filtration rate, CRP levels, chemerin levels and GDF-15 levels

Supplementary Table S7. Cox regression analysis of all-cause mortality and MACEs rate between the groups stratified by the sST2 levels and *IL1RL1* WGRS

| Group 1*            |             | Group 2*          |         | Group 3*          |       | Group 4*            |             |  |         |
|---------------------|-------------|-------------------|---------|-------------------|-------|---------------------|-------------|--|---------|
| All-cause mortality |             |                   |         |                   |       |                     |             |  |         |
| Patient numbers     | 86          | 170               |         | 182               |       | 74                  |             |  |         |
| Number of events    | 1           | 7                 |         | 12                |       | 11                  |             |  |         |
|                     | HR (95% CI) |                   | P value | HR (95% CI)       |       | P value             | HR (95% CI) |  | P value |
| Model 1             | Reference   | 3.75 (0.46-30.45) | 0.217   | 5.60 (0.73-43.10) | 0.098 | 14.13 (1.82-109.55) | 0.011       |  |         |
| Model 2             | Reference   | 3.80 (0.47-30.95) | 0.213   | 5.76 (0.74-44.72) | 0.094 | 12.44 (1.59-97.08)  | 0.016       |  |         |
| Model 3             | Reference   | 3.60 (0.44-29.44) | 0.233   | 5.49 (0.71-42.74) | 0.104 | 10.55 (1.32-84.02)  | 0.026       |  |         |
| Model 4             | Reference   | 2.61 (0.29-23.24) | 0.389   | 1.46 (0.16-13.49) | 0.739 | 4.99 (0.57-43.61)   | 0.147       |  |         |
| MACEs               |             |                   |         |                   |       |                     |             |  |         |
| Patient numbers     | 86          | 170               |         | 182               |       | 74                  |             |  |         |
| Number of events    | 3           | 16                |         | 24                |       | 15                  |             |  |         |
|                     | HR (95% CI) |                   | P value | HR (95% CI)       |       | P value             | HR (95% CI) |  | P value |
| Model 1             | Reference   | 2.93 (0.85-10.04) | 0.088   | 3.04 (0.91-10.16) | 0.071 | 6.04 (1.75-20.93)   | 0.005       |  |         |
| Model 2             | Reference   | 2.91 (0.85-10.00) | 0.091   | 3.08 (0.92-10.34) | 0.069 | 6.08 (1.75-21.12)   | 0.005       |  |         |
| Model 3             | Reference   | 3.00 (0.87-10.38) | 0.082   | 3.04 (0.90-10.24) | 0.073 | 5.90 (1.68-20.72)   | 0.006       |  |         |
| Model 4             | Reference   | 2.70 (0.73-9.97)  | 0.136   | 1.73 (0.48-6.31)  | 0.406 | 3.24 (0.81-12.88)   | 0.095       |  |         |

\*Group 1, low sST2 levels/low *IL1RL1* WGRS; Group 2, low sST2 levels/high *IL1RL1* WGRS; Group 3, high sST2 levels/high *IL1RL1* WGRS; Group 4, high sST2 levels/low *IL1RL1* WGRS.

Abbreviations: HR, hazard ration; CI, confidence interval

Model 1, Unadjusted

Model 2, Adjusted for age, sex, BMI and smoking status

Model 3: Adjusted for age, sex, BMI, smoking status, diabetes mellitus, hypertension, and dyslipidemia.

Model 4: Adjusted for age, sex, BMI, smoking status, diabetes mellitus, hypertension, dyslipidemia, uric acid level, estimated glomerular filtration rate, CRP levels, chemerin levels and GDF-15 levels

Supplementary Table S8. The inflammatory biomarker levels according to the resistin level and *RETN* WGRS and sST2 levels and *IL1RL1* WGRS

| Resistin level and <i>RETN</i> WGRS                                                                        |                          |                                |                          |                        |                        |                        |
|------------------------------------------------------------------------------------------------------------|--------------------------|--------------------------------|--------------------------|------------------------|------------------------|------------------------|
|                                                                                                            | Low resistin levels      | Low resistin levels            | High resistin levels     | High resistin levels   | P                      | P1                     |
|                                                                                                            | Low <i>RETN</i> WGRS     | High <i>RETN</i> WGRS          | High <i>RETN</i> WGRS    | Low <i>RETN</i> WGRS   |                        |                        |
| Uric acid                                                                                                  | 396.8±106.5              | 371.2±97.0                     | 373.6±104.1              | 395.0±109.5            | 0.153                  | 0.213                  |
| eGFR                                                                                                       | 68.3±19.7                | 75.8±20.1                      | 66.3±22.2                | 55.5±26.3              | 2.37×10 <sup>-8</sup>  | 0.018                  |
| CRP                                                                                                        | 2.20 (1.10-3.90)         | 2.35 (1.48-3.33)               | 2.35 (1.13-4.28)         | 3.10 (1.70-5.90)       | 0.059                  | 0.053                  |
| Chemerin                                                                                                   | 116.1 (91.9-150.1)       | 99.9 (80.6-131.1)              | 134.8 (102.7-166.5)      | 145.5 (117.3-201.7)    | 3.00×10 <sup>-6</sup>  | 5.00×10 <sup>-6</sup>  |
| GDF-15                                                                                                     | 0.85 (0.61-1.20)         | 0.74 (0.56-1.10)               | 1.10 (0.79-1.76)         | 1.26 (0.81-2.47)       | 1.56×10 <sup>-8</sup>  | 1.35×10 <sup>-8</sup>  |
| sST2 level and <i>IL1RL1</i> WGRS                                                                          |                          |                                |                          |                        |                        |                        |
|                                                                                                            | Low sST2 levels          | Low sST2 levels                | High sST2 levels         | High sST2 levels       | P                      | P1                     |
|                                                                                                            | Low <i>IL1RL1</i> WGRS   | High <i>IL1RL1</i> WGRS        | High <i>IL1RL1</i> WGRS  | Low <i>IL1RL1</i> WGRS |                        |                        |
| Uric acid                                                                                                  | 388.9±104.8              | 388.2±105.0                    | 390.8±110.6              | 375.9±97.6             | 0.828                  | 0.999                  |
| eGFR                                                                                                       | 67.6±23.1                | 69.9±19.8                      | 62.3±23.5                | 62.0±23.5              | 0.008                  | 0.004                  |
| CRP                                                                                                        | 2.00 (1.28-3.20)         | 2.60 (1.43-4.58)               | 2.60 (1.15-5.10)         | 2.80 (1.48-5.10)       | 0.084                  | 0.126                  |
| Chemerin                                                                                                   | 121.3 (91.6-147.4)       | 120.6 (93.0-151.5)             | 135.6 (98.9-175.2)       | 133.2 (102.0-171.8)    | 0.001                  | 2.60×10 <sup>-4</sup>  |
| GDF-15                                                                                                     | 0.88 (0.63-1.35)         | 0.87 (0.68-1.16)               | 1.06 (0.73-2.08)         | 1.30 (0.70-2.22)       | 8.9×10 <sup>-5</sup>   | 6.60×10 <sup>-8</sup>  |
| Combined High resistin levels/low <i>RETN</i> WGRS group and high sST2 levels/low <i>IL1RL1</i> WGRS group |                          |                                |                          |                        |                        |                        |
|                                                                                                            | None of these two groups | Either one of these two groups | Both of these two groups |                        | P                      | P1                     |
| Uric acid                                                                                                  | 386.7±105.3              | 391.4±107.7                    | 370.0±94.0               |                        | 0.729                  | 0.639                  |
| eGFR                                                                                                       | 69.2±20.4                | 60.4±25.0                      | 47.2±30.0                |                        | 9.07×10 <sup>-7</sup>  | 2.00×10 <sup>-6</sup>  |
| CRP                                                                                                        | 2.30 (1.20-3.87)         | 2.90 (1.45-5.80)               | 3.50 (2.10-5.48)         |                        | 0.007                  | 0.006                  |
| Chemerin                                                                                                   | 121.1 (91.3-153.3)       | 137.3 (102.9-179.2)            | 171.7 (118.5-1256.1)     |                        | 6.72×10 <sup>-8</sup>  | 4.12×10 <sup>-7</sup>  |
| GDF-15                                                                                                     | 0.88 (0.65-1.33)         | 1.14 (0.77-2.02)               | 1.94 (0.99-4.30)         |                        | 5.40×10 <sup>-10</sup> | 4.21×10 <sup>-10</sup> |

sST2, sST2, soluble suppression of tumorigenicity 2; WGRS, weighted genetic risk scores; eGFR, estimated glomerular filtration rate; CRP, C reactive protein; GDF-15, growth differentiation factor 15.

P1; adjusted for age, sex, body mass index and smoking

Supplementary Table S9. Definition of disease and smoking status

|                   |                                                                                                                                                                                                                                                                       |
|-------------------|-----------------------------------------------------------------------------------------------------------------------------------------------------------------------------------------------------------------------------------------------------------------------|
| Hypertension      | Patients were considered to have hypertension if they had systolic blood pressure (BP) $\geq 140$ mm Hg, diastolic BP $\geq 90$ mm Hg or medical records documenting hypertension and the prescription of antihypertensive drugs.                                     |
| Diabetes mellitus | DM was defined according to the guidelines of the American Diabetes Association as a fasting plasma glucose level $\geq 126$ mg/dL, a glycohemoglobin value $\geq 6.5\%$ , or having medical records documenting diabetes mellitus and receiving hypoglycemic agents. |
| Dyslipidemia      | Dyslipidemia was defined as serum cholesterol level $\geq 200$ mg/dL, triglyceride level $\geq 200$ mg/dL or the use of lipid-lowering drugs.                                                                                                                         |
| Smoking           | Smoking was determined based on history, previous medical records, current medication, and by examination during hospitalization. Current smokers were defined as those who regularly smoked cigarettes at the time of the survey.                                    |

Supplementary Table S10. Biomarkers inter- and intra-assay variability measures

| Biomarkers | Source | Intra-assay | Inter-assay |
|------------|--------|-------------|-------------|
| Resistin   | Plasma | CV=3.8%     | CV=5.8%     |
| sST2       | Plasma | CV=4.9%     | CV=5.0%     |
| CRP        | Serum  | CV=7.1%     | CV=9.5%     |
| Chemerin   | Plasma | CV=1.4%     | CV=4.2%     |
| GDF-15     | PLasma | CV=1.2%     | CV=5.5%     |

sST2, soluble suppression of tumorigenicity 2; CRP, C-reactive protein; GDF, growth differentiation factor;

CV: coefficient of variation.
